# Supplementary material for: Syndecan-3 regulates MSC adhesion, ERK and AKT signalling in vitro and its deletion enhances MSC efficacy in a model of inflammatory arthritis in vivo
Source: PubMed Central journal article supplement (PMC7686503; doi:10.1038/s41598-020-77514-z), 2020-11-24
Supplement: 41598_2020_77514_MOESM1_ESM.pdf [file 41598_2020_77514_MOESM1_ESM.pdf]

## Supplementary Information

**Title:** Syndecan-3 regulates MSC adhesion, ERK and AKT signalling in vitro and its deletion enhances MSC efficacy in a model of inflammatory arthritis in vivo

**Authors:** Fiona K Jones<sup>1†</sup>, Andrei Stefan<sup>2†</sup>, Alasdair G Kay<sup>3</sup>, Mairead Hyland<sup>2</sup>, Rebecca Morgan<sup>2</sup>, Nicholas R Forsyth<sup>4</sup>, Addolorata Pisconti<sup>1</sup> and Oksana Kehoe<sup>2\*</sup>

## Supplementary Figures

**Supplementary Figure 1.** The following images are the full-length immunoblots from Figure 3. Black boxes indicate border of the blots.

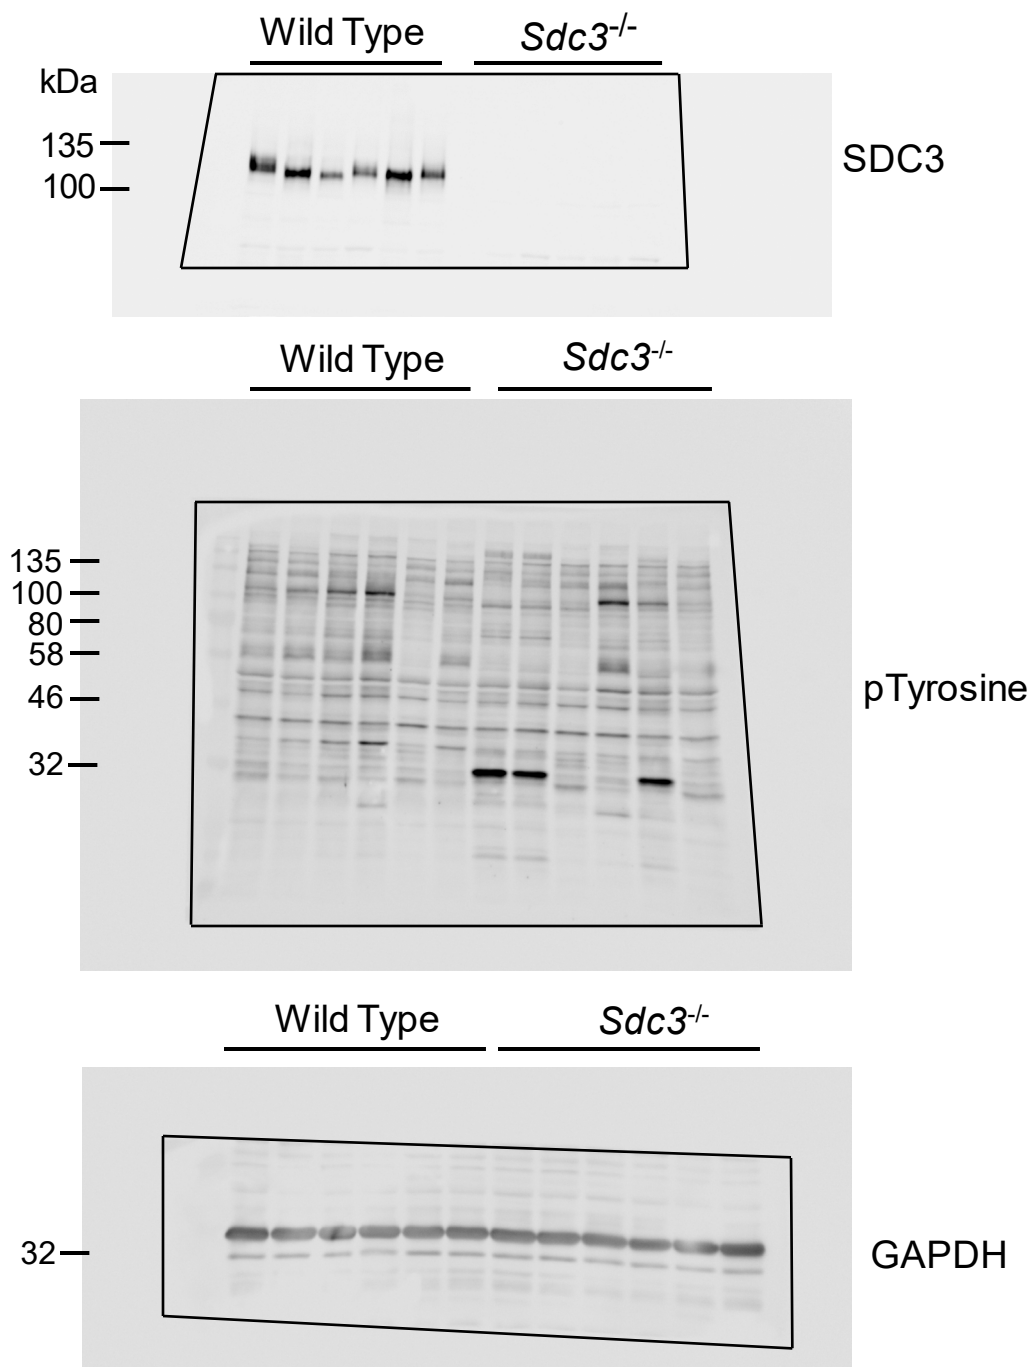

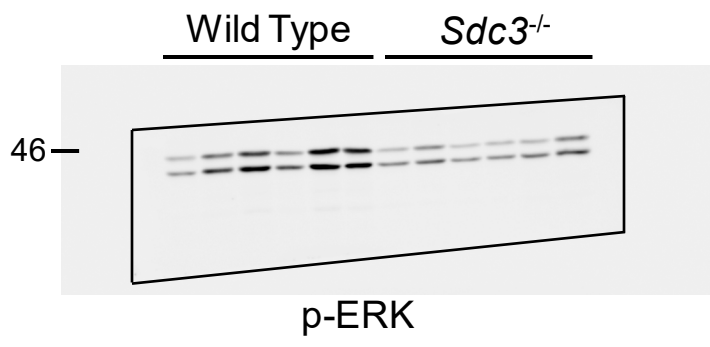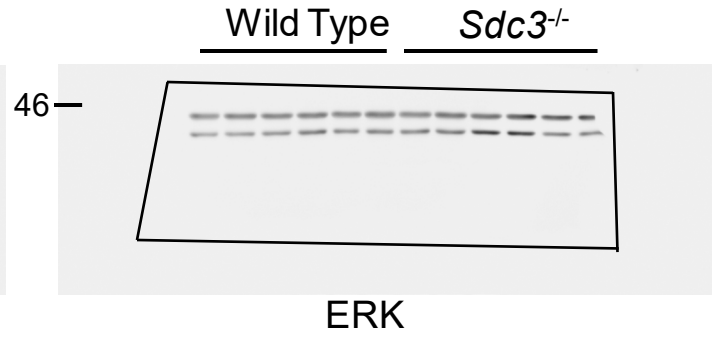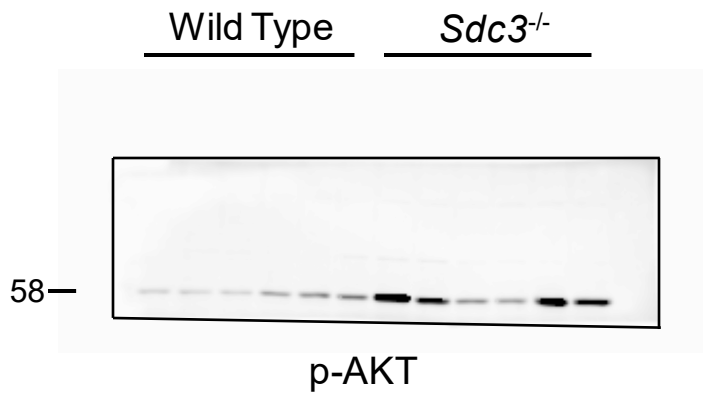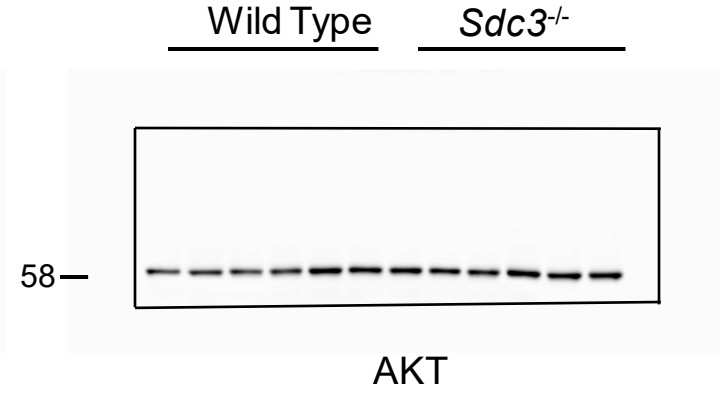

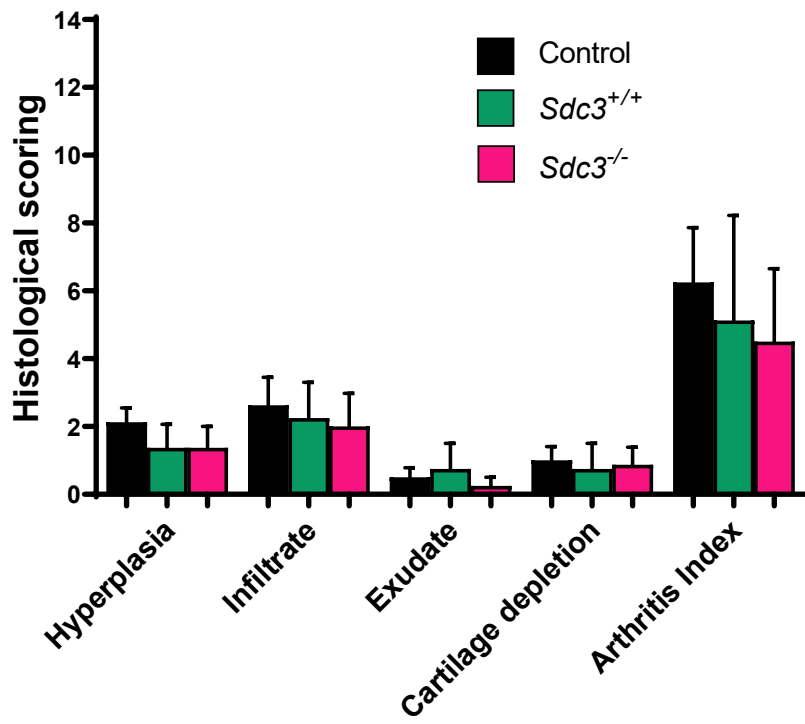

**Supplementary Figure 2.** The histological scoring for 7 days post arthritis induction. The arthritis index is the sum of all observations. Data are means  $\pm$  SEM, n=4 mice in each group.
